# Supplementary material for: Evaluating the Accuracy, Quality, and Readability of Online Breast Cancer Information
Source: PubMed Central journal article supplement — Ann Surg Open. 2024 Jul 15;5(3):e465. doi: 10.1097/AS9.0000000000000465 (PMC11415127; doi:10.1097/as9.0000000000000465), 2024-07-15
Supplement: as9-5-e465-s001.pdf [file as9-5-e465-s001.pdf]

## **SDC, Appendix**

### **Website List**

#### **BREAST CANCER - Access date June 1 2022**

- 1 <https://www.mayoclinic.org/diseases-conditions/breast-cancer/symptoms-causes/syc-20352470>
  - 2 <https://www.cancer.org/cancer/types/breast-cancer.html>
  - 3 [https://www.cdc.gov/cancer/breast/basic\\_info/index.htm](https://www.cdc.gov/cancer/breast/basic_info/index.htm)
  - 4 <https://www.breastcancer.org/about-breast-cancer>
  - 5 <https://www.cancer.gov/types/breast>
  - 6 <https://my.clevelandclinic.org/health/diseases/3986-breast-cancer>
  - 7 <https://medlineplus.gov/breastcancer.html>
  - 8 <https://www.webmd.com/breast-cancer/default.htm>
  - 9 <https://www.mdanderson.org/cancer-types/breast-cancer.html>
- <https://www.medicalnewstoday.com/articles/37136>

#### **BREAST CANCER SURGERY – Access date June 1 2022**

- 1 <https://www.cancerresearchuk.org/about-cancer/breast-cancer/treatment/surgery/types-surgery>
- 2 <https://www.mayoclinic.org/tests-procedures/breast-cancer-surgery/about/pac-20385255>
- 3 <https://www.cancer.org/cancer/breast-cancer/treatment/surgery-for-breast-cancer.html>
- 4 <https://www.komen.org/breast-cancer/treatment/type/surgery/>
- 5 <https://my.clevelandclinic.org/health/treatments/8338-breast-cancer-surgery>
- 6 <https://www.webmd.com/breast-cancer/breast-cancer-surgery-options>
- 7 <https://www.breastcancer.org/treatment/surgery>
- 8 <https://www.cancer.gov/types/breast/surgery-choices>
- 9 <https://www.cancercenter.com/cancer-types/breast-cancer/treatments/surgery>
- 10 <https://www.cancer.net/cancer-types/breast-cancer/types-treatment>

#### **BREAST CANCER RECONSTRUCTION SURGERY– Access date June 6 2022**

- 1 <https://www.cancer.org/cancer/breast-cancer/reconstruction-surgery/breast-reconstruction-options.html>
- 2 <https://www.breastcancer.org/treatment/surgery/breast-reconstruction/types/implant-reconstruction>
- 3 <https://www.cancer.gov/types/breast/reconstruction-fact-sheet>
- 4 <https://my.clevelandclinic.org/health/treatments/16809-breast-reconstruction>
- 5 <https://www.plasticsurgery.org/reconstructive-procedures/breast-reconstruction>
- 6 <https://www.komen.org/breast-cancer/treatment/type/surgery/breast-reconstruction/>
- 7 <https://www.webmd.com/breast-cancer/breast-reconstruction-after-mastectomy>
- 8 <https://www.mayoclinic.org/tests-procedures/breast-reconstruction-implants/about/pac-20384934>
- 9 <https://www.mdanderson.org/treatment-options/breast-reconstruction.html>

10 <https://www.mskcc.org/cancer-care/types/breast/reconstruction-prosthesis/breast-implants-msk>

### **BREAST CANCER CHEMOTHERAPY – Access date June 6 2022**

1 <https://www.cancer.org/cancer/breast-cancer/treatment/chemotherapy-for-breast-cancer.html>

2 <https://www.mayoclinic.org/tests-procedures/chemotherapy-for-breast-cancer/about/pac-20384931>

3 <https://www.webmd.com/breast-cancer/treatment-chemotherapy>

4 <https://my.clevelandclinic.org/health/treatments/8340-chemotherapy-for-breast-cancer>

5 <https://www.mskcc.org/cancer-care/types/breast/treatment/systemic-therapy/chemotherapy>

6 <https://www.breastcancer.org/treatment/chemotherapy>

7 <https://www.komen.org/breast-cancer/treatment/type/chemotherapy/>

8 <https://breastcancer.org/information-support/facing-breast-cancer/going-through-treatment-breast-cancer/chemotherapy>

9 <https://www.cancerresearchuk.org/about-cancer/breast-cancer/treatment/chemotherapy>

10 <https://www.nationalbreastcancer.org/breast-cancer-chemotherapy>

### **BREAST CANCER RADIATION - Access date June 7 2022**

1 <https://www.cancer.org/cancer/breast-cancer/treatment/radiation-for-breast-cancer.html>

2 <https://www.mayoclinic.org/tests-procedures/radiation-therapy-for-breast-cancer/about/pac-20384940>

3 <https://www.breastcancer.org/treatment/radiation-therapy>

4 <https://www.mskcc.org/cancer-care/types/breast/treatment/radiation-therapy>

5 <https://my.clevelandclinic.org/health/treatments/9191-radiation-therapy-for-breast-cancer>

6 <https://www.healthline.com/health/breast-cancer/radiation-for-breast-cancer>

7 <https://www.nationalbreastcancer.org/breast-cancer-radiation-therapy>

8 <https://www.komen.org/breast-cancer/treatment/type/radiation-therapy/>

9 <https://www.cancerresearchuk.org/about-cancer/breast-cancer/treatment/radiotherapy/radiotherapy-treatment>

10 <https://www.ucsfhealth.org/education/radiation-therapy-for-breast-cancer>
